# Supplementary figures and images for: Intersession reliability of fMRI activation for heat pain and motor tasks
Source: PubMed Central journal article supplement — Neuroimage Clin. 2014 Jul 22;5:309–21. doi: 10.1016/j.nicl.2014.07.005 (PMC4141974; doi:10.1016/j.nicl.2014.07.005), 2014-07-22

**A.** Session 1

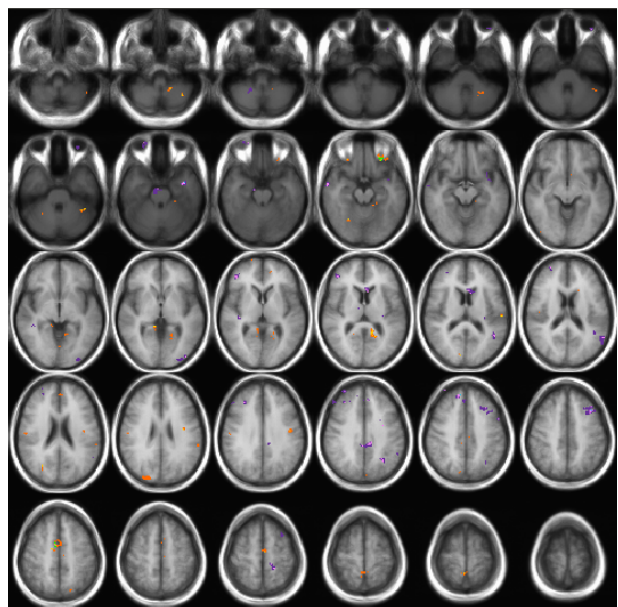

**B.** Session 2

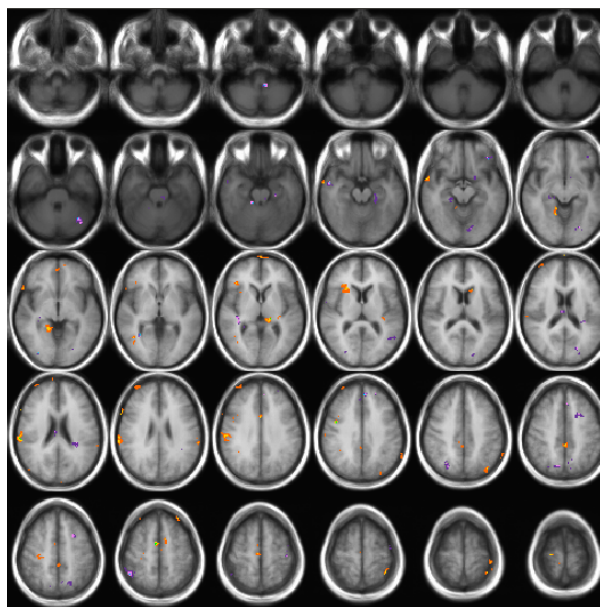

**C.** Session 3

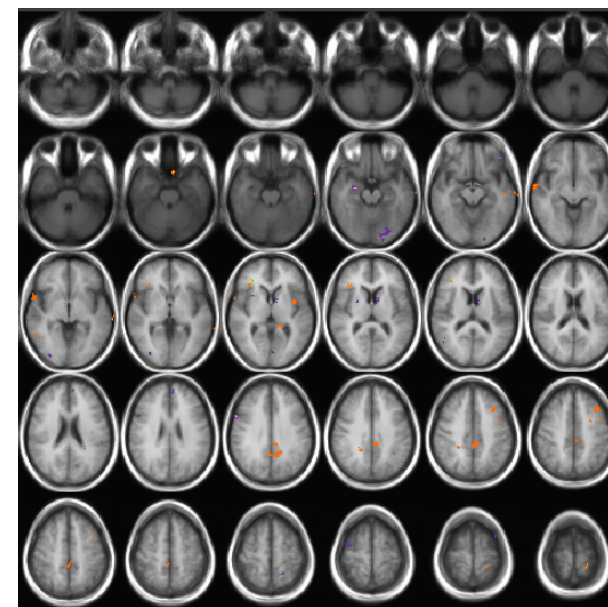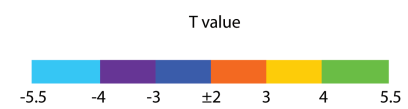

Supplement: mmc1.pdf [file mmc1.pdf]
